# Supplementary material for: Stress-specific p38 MAPK activation is sufficient to drive EGFR endocytosis but not its nuclear translocation
Source: Oxford University Press journal article supplement (doi:10.1242/jcs.202358), 2017-06-24
Supplement: jcs202358supp.pdf [file jcs202358supp.pdf]

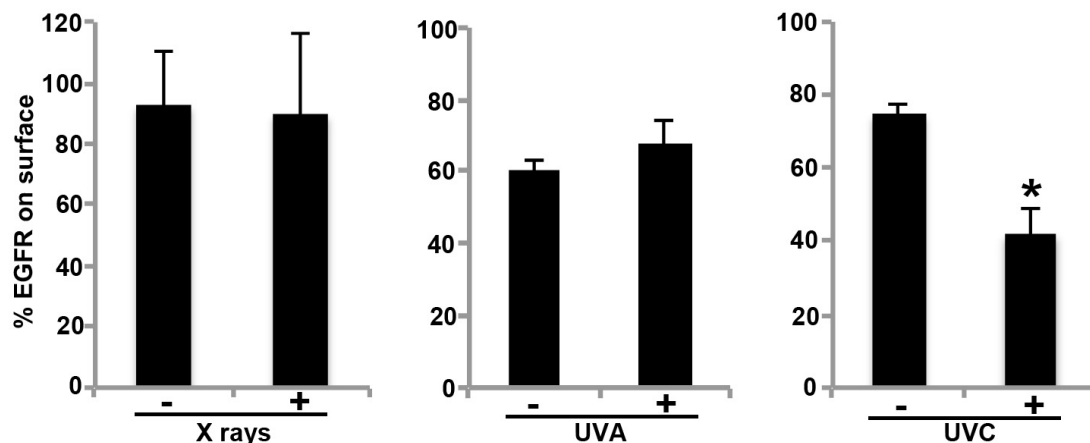

**Figure S1 Surface down regulation of EGFR in HeLa cells after treatment with UVC but not X-rays or UVA.**

HeLa cells were untreated or treated with a single dose of X-rays (4Gy), UVA (10,000J/m<sup>2</sup>) or UVC (100J/m<sup>2</sup>) and incubated at 37°C for 60 mins. Surface binding of anti-EGFR extracellular domain antibody was then quantitated with and without permeabilisation, normalised to total cell number and surface binding expressed as % total. Results are mean +/-SD. \*P<0.05 (students t test).

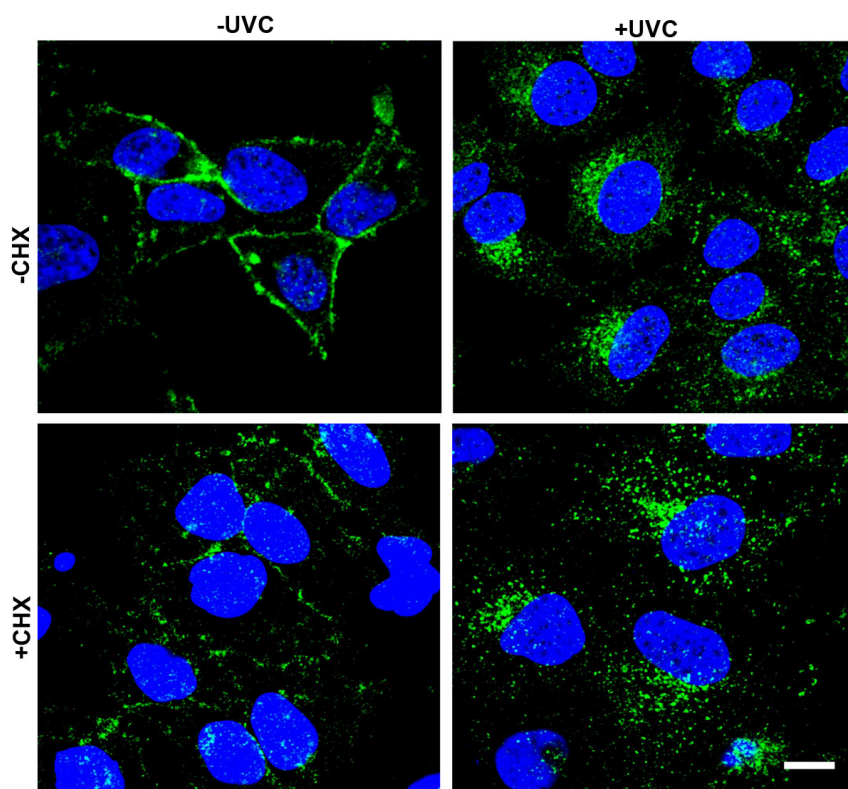

**Figure S2 Cycloheximide treatment does not affect intracellular accumulation of EGFR.**

HeLa cells were pretreated with cycloheximide (CHX) for 2 hours (to prevent protein synthesis) and then treated with a single dose of UVC (100J/m<sup>2</sup>) and staining with anti-EGFR cytoplasmic domain antibody (green) and Hoechst (blue). UVC treatment induces perinuclear accumulation of EGFR in the presence or absence of cycloheximide. Bar: 10µm.

## Movies

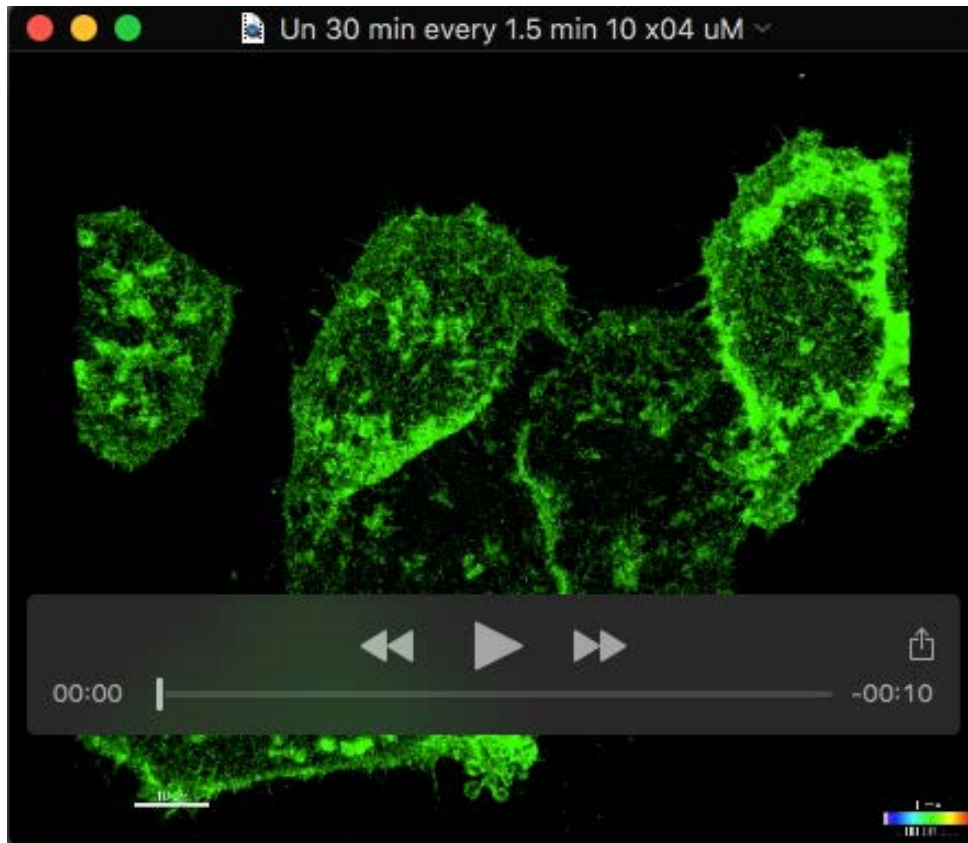

### **Movie 1 EGFR-GFP remains on the plasma membrane in untreated HeLa cells**

HeLa cells transiently transfected with EGFR-GFP were serum-starved overnight, then the medium was replaced with CIM and the cells were imaged for 30 mins at 37°C with images acquired every 90 sec. Bar:10 $\mu$ m.

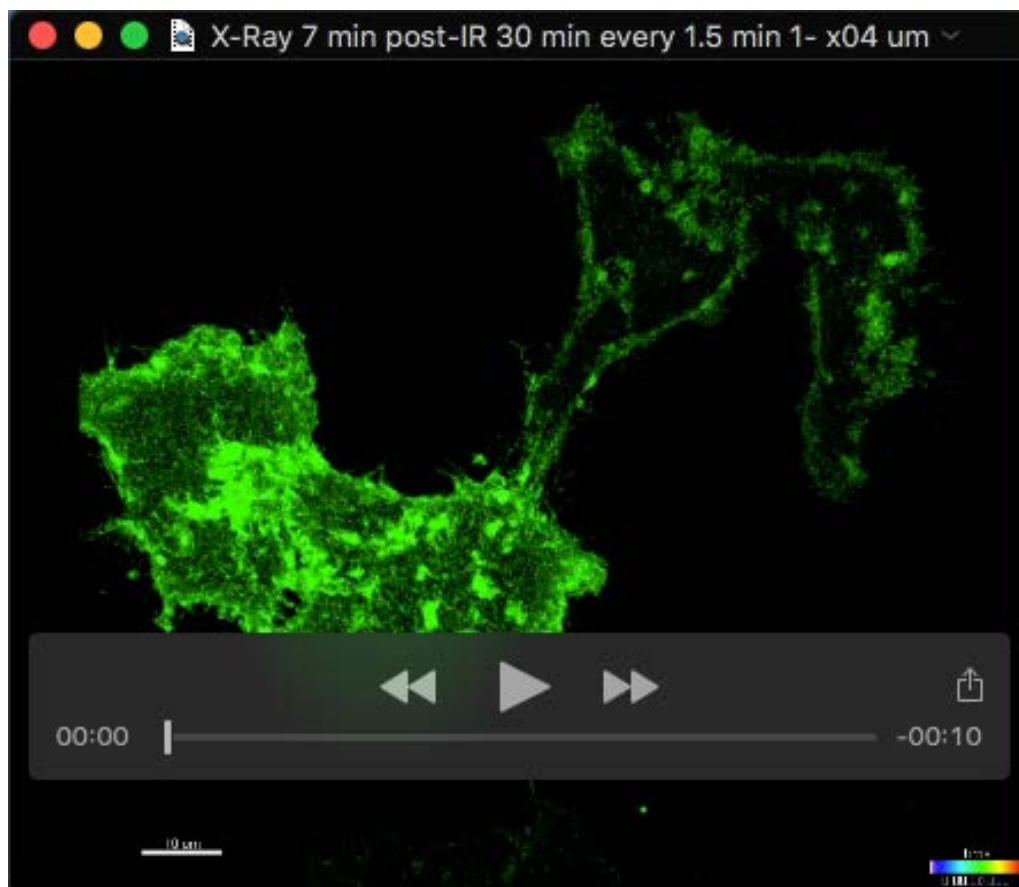

### **Movie 2 EGFR-GFP remains on the plasma membrane after X-ray treatment in HeLa cells**

HeLa cells transiently transfected with EGFR-GFP were serum-starved overnight, then the medium was replaced with CIM and the cells were treated with X-rays (8Gy). The cells were imaged as in Movie 1, with first frame acquired at 7 min after irradiation. Bar:10 $\mu$ m.

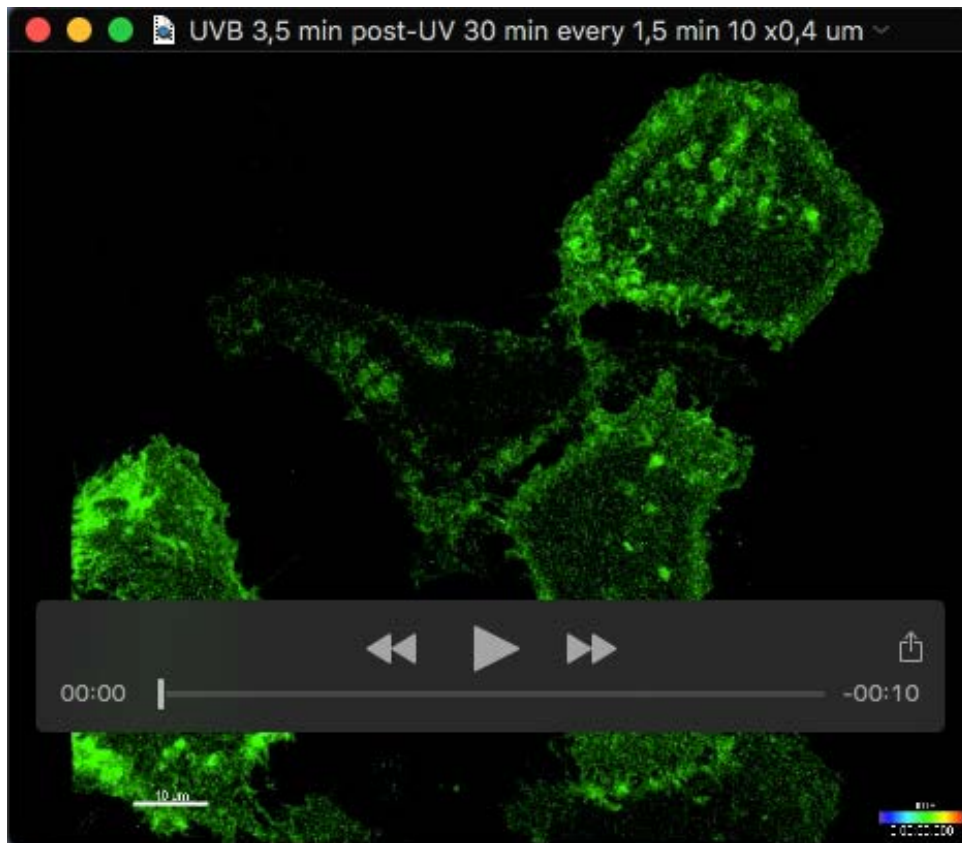

**Movie 3 EGFR-GFP moves from the plasma membrane to intracellular punctae after UVB treatment in HeLa cells**

HeLa cells transiently transfected with EGFR-GFP were serum-starved overnight, then the medium was replaced with CIM and the cells were treated with UVB (800J/m<sup>2</sup>). The cells were imaged as in Movie 1, with first frame acquired at 3.5 min after irradiation. Bar:10µm.
